# Supplementary material for: Effects of Pregnancy on Plasma Sphingolipids Using a Metabolomic and Quantitative Analysis Approach
Source: MDPI journal article supplement (doi:10.3390/metabo13091026), 2023-09-21
Supplement: s1 [file s1]

**Table 1.** Ceramide Pregnant and Postpartum Metabolite Batch Normalized and Imputed Peak Areas.

| Ceramides                                      | Pregnant    | Postpartum  | Pregnancy/<br>Postpartum | p-value             | q-value             |
|------------------------------------------------|-------------|-------------|--------------------------|---------------------|---------------------|
| N-behenoyl-sphingadienine (d18:2/22:0)*        | 0.91 ± 0.25 | 1.19 ± 0.41 | 0.82 ± 0.26              | 9×10 <sup>-7</sup>  | 2×10 <sup>-7</sup>  |
| ceramide (d18:1/20:0, d16:1/22:0, d20:1/18:0)* | 1.07 ± 0.25 | 0.98 ± 0.25 | 1.15 ± 0.35              | 9×10 <sup>-3</sup>  | 1×10 <sup>-3</sup>  |
| N-palmitoyl-heptadecasphingosine (d17:1/16:0)* | 1.12 ± 0.33 | 0.91 ± 0.26 | 1.28 ± 0.36              | 1×10 <sup>-6</sup>  | 3×10 <sup>-7</sup>  |
| N-palmitoyl-sphingosine (d18:1/16:0)           | 1.18 ± 0.26 | 0.88 ± 0.19 | 1.39 ± 0.37              | 3×10 <sup>-10</sup> | 1×10 <sup>-10</sup> |
| ceramide (d18:1/17:0, d17:1/18:0)*             | 1.21 ± 0.39 | 0.84 ± 0.28 | 1.52 ± 0.55              | 3×10 <sup>-9</sup>  | 1×10 <sup>-9</sup>  |
| N-stearoyl-sphingadienine (d18:2/18:0)*        | 1.24 ± 0.43 | 0.90 ± 0.31 | 1.49 ± 0.60              | 2×10 <sup>-6</sup>  | 5×10 <sup>-7</sup>  |
| N-stearoyl-sphingosine (d18:1/18:0)*           | 1.27 ± 0.41 | 0.85 ± 0.27 | 1.58 ± 0.57              | 3×10 <sup>-10</sup> | 1×10 <sup>-10</sup> |

<sup>1</sup> Pregnant and postpartum values represent median scaled peak areas. P values from paired Student's t-test. P-values, q-values, and fold change for all identified metabolites can be found in the supplementary files of our previous paper [9].

**Table 2.** Sphingomyelins Pregnant and Postpartum Batch Normalized and Imputed Metabolite Peak Areas.

| Sphingomyelins                                      | Pregnant    | Postpartum  | Pregnancy/<br>Postpartum | p-value            | q-value             |
|-----------------------------------------------------|-------------|-------------|--------------------------|--------------------|---------------------|
| hydroxypalmitoyl sphingomyelin (d18:1/16:0(OH))**   | 1.02 ± 0.29 | 1.13 ± 0.34 | 0.93 ± 0.25              | 6×10 <sup>-3</sup> | 9×10 <sup>-4</sup>  |
| sphingomyelin (d18:1/14:0, d16:1/16:0)*             | 1.05 ± 0.19 | 0.95 ± 0.18 | 1.11 ± 0.16              | 5×10 <sup>-5</sup> | 1×10 <sup>-5</sup>  |
| palmitoyl sphingomyelin (d18:1/16:0)                | 1.05 ± 0.13 | 0.97 ± 0.13 | 1.10 ± 0.14              | 4×10 <sup>-5</sup> | 9×10 <sup>-6</sup>  |
| stearoyl sphingomyelin (d18:1/18:0)                 | 1.06 ± 0.22 | 0.99 ± 0.27 | 1.13 ± 0.33              | 0.03               | 4×10 <sup>-3</sup>  |
| sphingomyelin (d18:1/20:1, d18:2/20:0)*             | 1.07 ± 0.24 | 0.97 ± 0.25 | 1.15 ± 0.32              | 5×10 <sup>-3</sup> | 7×10 <sup>-4</sup>  |
| sphingomyelin (d18:1/17:0, d17:1/18:0, d19:1/16:0)  | 1.07 ± 0.20 | 0.98 ± 0.20 | 1.11 ± 0.22              | 3×10 <sup>-3</sup> | 4×10 <sup>-4</sup>  |
| sphingomyelin (d18:1/20:0, d16:1/22:0)*             | 1.08 ± 0.16 | 0.92 ± 0.16 | 1.20 ± 0.23              | 2×10 <sup>-7</sup> | 5×10 <sup>-8</sup>  |
| sphingomyelin (d18:1/21:0, d17:1/22:0, d16:1/23:0)* | 1.08 ± 0.23 | 0.91 ± 0.21 | 1.22 ± 0.29              | 2×10 <sup>-6</sup> | 5×10 <sup>-7</sup>  |
| sphingomyelin (d18:2/16:0, d18:1/16:1)*             | 1.09 ± 0.18 | 0.98 ± 0.15 | 1.13 ± 0.21              | 2×10 <sup>-4</sup> | 3×10 <sup>-5</sup>  |
| sphingomyelin (d18:1/18:1, d18:2/18:0)              | 1.10 ± 0.20 | 0.98 ± 0.20 | 1.15 ± 0.26              | 7×10 <sup>-4</sup> | 1×10 <sup>-4</sup>  |
| lignoceroyl sphingomyelin (d18:1/24:0)              | 1.10 ± 0.25 | 0.94 ± 0.18 | 1.19 ± 0.26              | 3×10 <sup>-5</sup> | 6×10 <sup>-6</sup>  |
| sphingomyelin (d18:2/24:1, d18:1/24:2)*             | 1.11 ± 0.18 | 0.90 ± 0.16 | 1.26 ± 0.25              | 3×10 <sup>-5</sup> | 1×10 <sup>-10</sup> |

|                                                     |             |             |             |                     |                     |
|-----------------------------------------------------|-------------|-------------|-------------|---------------------|---------------------|
| behenoyl sphingomyelin (d18:1/22:0)*                | 1.11 ± 0.30 | 0.98 ± 0.23 | 1.18 ± 0.38 | 0.02                | 2×10 <sup>-3</sup>  |
| sphingomyelin (d18:2/18:1)*                         | 1.14 ± 0.26 | 0.95 ± 0.21 | 1.23 ± 0.36 | 3×10 <sup>-5</sup>  | 7×10 <sup>-6</sup>  |
| sphingomyelin (d18:2/23:0, d18:1/23:1, d17:1/24:1)* | 1.14 ± 0.23 | 0.92 ± 0.16 | 1.27 ± 0.27 | 5×10 <sup>-9</sup>  | 2×10 <sup>-9</sup>  |
| tricosanoyl sphingomyelin (d18:1/23:0)*             | 1.16 ± 0.23 | 0.92 ± 0.15 | 1.29 ± 0.30 | 3×10 <sup>-9</sup>  | 1×10 <sup>-9</sup>  |
| sphingomyelin (d18:2/14:0, d18:1/14:1)*             | 1.16 ± 0.38 | 0.90 ± 0.26 | 1.32 ± 0.33 | 6×10 <sup>-9</sup>  | 2×10 <sup>-9</sup>  |
| sphingomyelin (d18:1/24:1, d18:2/24:0)*             | 1.17 ± 0.24 | 0.88 ± 0.19 | 1.37 ± 0.35 | 1×10 <sup>-9</sup>  | 4×10 <sup>-10</sup> |
| sphingomyelin (d18:2/24:2)*                         | 1.18 ± 0.30 | 0.84 ± 0.22 | 1.45 ± 0.38 | 1×10 <sup>-12</sup> | 8×10 <sup>-13</sup> |
| sphingomyelin (d17:2/16:0, d18:2/15:0)*             | 1.18 ± 0.42 | 0.95 ± 0.27 | 1.27 ± 0.37 | 8×10 <sup>-6</sup>  | 2×10 <sup>-6</sup>  |
| sphingomyelin (d18:1/22:2, d18:2/22:1, d16:1/24:2)* | 1.20 ± 0.26 | 0.84 ± 0.21 | 1.47 ± 0.37 | 7×10 <sup>-14</sup> | 5×10 <sup>-14</sup> |
| sphingomyelin (d18:2/21:0, d16:2/23:0)*             | 1.21 ± 0.30 | 0.88 ± 0.18 | 1.40 ± 0.34 | 3×10 <sup>-12</sup> | 1×10 <sup>-12</sup> |
| sphingomyelin (d17:1/14:0, d16:1/15:0)*             | 1.21 ± 0.40 | 0.91 ± 0.28 | 1.36 ± 0.39 | 2×10 <sup>-8</sup>  | 7×10 <sup>-9</sup>  |
| sphingomyelin (d18:1/19:0, d19:1/18:0)*             | 1.21 ± 0.26 | 0.85 ± 0.19 | 1.47 ± 0.37 | 2×10 <sup>-13</sup> | 1×10 <sup>-13</sup> |
| sphingomyelin (d18:2/23:1)*                         | 1.22 ± 0.28 | 0.83 ± 0.17 | 1.49 ± 0.35 | 3×10 <sup>-15</sup> | 2×10 <sup>-15</sup> |
| sphingomyelin (d18:1/20:2, d18:2/20:1, d16:1/22:2)* | 1.41 ± 0.37 | 0.77 ± 0.22 | 1.94 ± 0.66 | 3×10 <sup>-16</sup> | 4×10 <sup>-16</sup> |

<sup>1</sup> Pregnant and postpartum values represent median scaled peak areas. P values from paired Student's t-test. P-values, q-values, and fold change for all identified metabolites can be found in the supplementary files of our previous paper [9].

**Table 3.** Sphingosines Pregnant and Postpartum Batch Normalized and Imputed Metabolite Peak Area.

| Sphingosines                 | Pregnant    | Postpartum  | Pregnancy/<br>Postpartum | p-value            | q-value            |
|------------------------------|-------------|-------------|--------------------------|--------------------|--------------------|
| hexadecasphingosine (d16:1)* | 0.95 ± 0.35 | 1.17 ± 0.41 | 0.87 ± 0.31              | 3×10 <sup>-4</sup> | 6×10 <sup>-5</sup> |
| sphingosine 1-phosphate      | 1.19 ± 0.48 | 1.03 ± 0.33 | 1.22 ± 0.50              | 0.04               | 5×10 <sup>-3</sup> |

<sup>1</sup> Pregnant and postpartum values represent median scaled peak areas. P values from paired Student's t-test. P-values, q-values, and fold change for all identified metabolites can be found in the supplementary files of our previous paper [9].

## References

- Enthoven LF, Shi Y, Fay EE, et al. The Effects of Pregnancy on Amino Acid Levels and Nitrogen Disposition. *Metabolites*. 2023;13(2):242. Published 2023 Feb 7. doi:10.3390/metabo13020242.
